# Supplementary material
Source: PubMed Central journal article supplement (PMC6290140)
Supplement: supp_RA118.006052_141052_1_supp_222682_ph206k.pdf [file supp_RA118.006052_141052_1_supp_222682_ph206k.pdf]

**Supplemental Material: The structures of penicillin binding protein 4 (PBP4) and PBP5 from *Enterococci* provide structural insights into  $\beta$ -lactam resistance**

Thomas M. Moon<sup>1^</sup>, Éverton D. D'Andréa<sup>1^</sup>, Christopher W. Lee<sup>2</sup>, Alexei Soares<sup>3</sup>, Jean Jakoncic<sup>3</sup>, Charlene Desbonnet<sup>4</sup>, Monica G. Solache<sup>4</sup>, Lou B. Rice<sup>4</sup>, Rebecca Page<sup>1</sup>, Wolfgang Peti<sup>1\*</sup>

## Contents

**Table S1.** Minimal Inhibitory concentrations (MICs) for different  $\beta$ -lactam antibiotics against *E. faecium* D344SRF (a strain in which the spontaneous loss of *pbp5* resulted in an Ampicillin-susceptible phenotype).

**Table S2.** Structural similarities between PBP4 and PBP5 domains

**Table S3.** Structural similarities between the free and acylated TP domains of PBP4 and PBP5

**Table S4.** Overlay of PBP2a with PBP5

**Figure S1.** Overlays of the low-affinity PBP family via the TP domains

**Figure S2.** Overlays of the low-affinity PBP family (PBP5 and PBP2a) via the N1 domain

## Supplementary Tables

**Table S1.** Impact of *E. faecium* PBP5 aa substitutions on ampicillin and ceftriaxone MICs

| Plasmid <sup>a</sup>           | Amino acid at the following position in PBP5 |     |     |       | MIC (µg/mL) |             | Reference |
|--------------------------------|----------------------------------------------|-----|-----|-------|-------------|-------------|-----------|
|                                | 485                                          | 499 | 629 | S466' | Ampicillin  | Ceftriaxone |           |
| pCWR624 (wt, susceptible PBP5) | M                                            | I   | E   | –     | 38          | 2150        | (1)       |
| pCWR666 <sup>b</sup>           | A                                            | T   | V   | +     | 185         | 6350        | (1)       |

<sup>a</sup>plasmid constructs in strain D344SRF; ampicillin MICs for D344SRF and D344SRF containing the vector plasmid pTCV-lac were repeatedly 2 µg/ml.

<sup>b</sup>pCWR666 contains mutations in addition to those designated (F497G, R598Q, P667S) and contains the pbp5 gene from highly resistant clinical strain *E. faecium* C68.

**Table S2.** Structural similarities between PBP4 and PBP5 domains

| PBP domain | PBP4 residues                            | PBP5 residues                            | RMSD (Å) |
|------------|------------------------------------------|------------------------------------------|----------|
| N1         | nv                                       | 39-174<br>314-339                        | nd       |
| N2         | 193-260                                  | 191-258                                  | 0.9      |
| nPB        | 177-188<br>267-315<br>342-350<br>386-411 | 175-186<br>265-313<br>340-348<br>384-409 | 0.75     |
| TP         | 349-383<br>410-678                       | 351-385<br>412-680                       | 1.1      |

nv, no interpretable electron density

nd, not determined

**Table S3.** Structural similarities between the free and acylated TP domains of PBP4 and PBP5

| PBP                           | RMSD (Å) |
|-------------------------------|----------|
| <b>PBP4</b> (compared to apo) |          |
| penG                          | 0.40     |
| imipenem                      | 0.31     |
| ceftaroline                   | 0.53     |
| <b>PBP5</b> (compared to apo) |          |
| penG                          | 0.36     |
| imipenem                      | 0.34     |

**Table S4.** Overlay of PBP2a with PBP5

| <b>PBP domain</b> | <b>PBP5 residues</b> | <b>PBP2a residues</b> | <b>RMSD (Å)</b> |
|-------------------|----------------------|-----------------------|-----------------|
| <b>N1</b>         | 87-126               | 66-105                | 2.5             |
|                   | 132-139              | 110-117               |                 |
|                   | 147-150              | 125-128               |                 |
|                   | 162-165              | 140-143               |                 |
|                   | 314-339              | 294-319               |                 |
| <b>N2</b>         | 187-200              | 165-178               | 0.8             |
|                   | 209-240              | 182-213               |                 |
| <b>TP</b>         | 349-383              | 330-364               | 2.3             |
|                   | 410-576              | 391-557               |                 |
|                   | 577-597              | 559-579               |                 |
|                   | 613-654              | 593-634               |                 |

**A. Full-length**

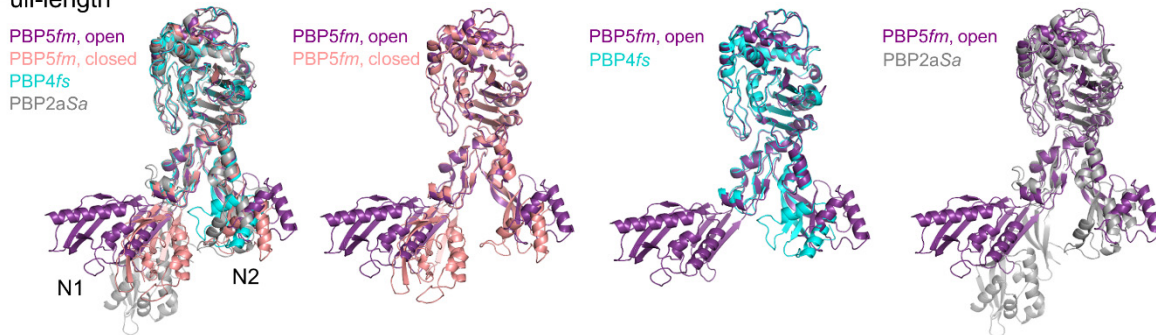

**B. TP domain**

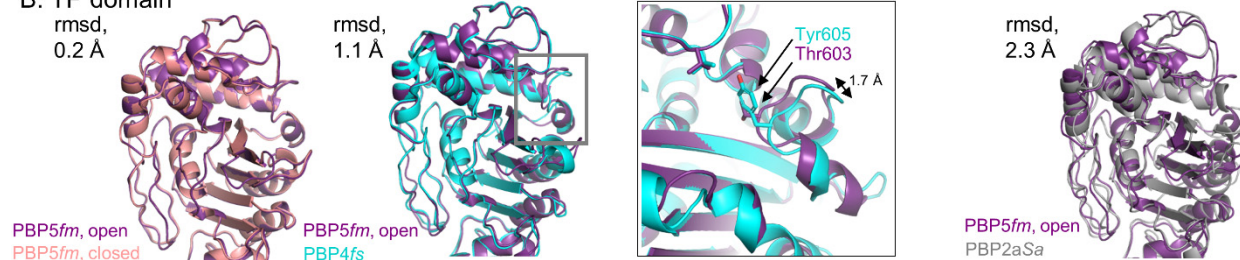

**Figure S1. Overlays of the low-affinity PBP family via the TP domains. A.** PBP5-open (magenta), PBP5-closed (beige), PBP4 (cyan) and PBP2a (grey) superimposed on one another via their TP domains illustrates the range of conformations that can be adopted by the N1 and N2 domains (labeled). **B.** Same overlays and colors as in 'A', but showing only the TP domains. The calculated RMSDs are reported.

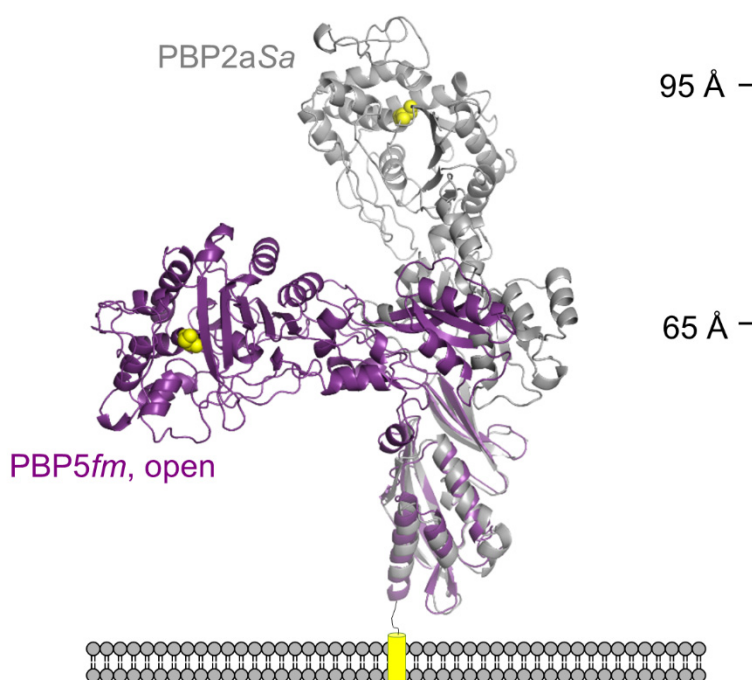

**Figure S2 Overlay of PBP5 and PBP2a via the N1 domain.** Assuming the N-terminal helix is co-linear with transmembrane helix results in the distances of the transpeptidase domain active sites being either ~65 Å or 95 Å away from the membrane.

### Supplementary References

1. Rice, L. B., Bellais, S., Carias, L. L., Hutton-Thomas, R., Bonomo, R. A., Caspers, P., Page, M. G. P., and Gutmann, L. (2004) Impact of specific *pbp5* mutations on expression of beta-lactam resistance in *Enterococcus faecium*. *Antimicrob. Agents Chemother.* **48**, 3028–3032
